# Supplementary material for: TGF-β Signaling in Liver, Pancreas, and Gastrointestinal Diseases and Cancer
Source: PubMed Central journal article supplement — Gastroenterology. Author manuscript; Available in PMC 2022 Feb 13. (PMC8841117; doi:10.1053/j.gastro.2021.04.064), 2021-04-30
Supplement: NIHMS1720183-supplement-1.pdf [file NIHMS1720183-supplement-1.pdf]

## Bone Morphogenetic Protein Signaling in Liver and Gastrointestinal Diseases and Cancer

Multiple receptor complexes respond to BMPs, but all of the BMPs signal through SMAD1 and SMAD5. Although the TGF- $\beta$  and BMP families signal through distinct receptor complexes and through distinct SMAD complexes, the pathways intersect at SMAD4, SMAD6, and SMAD7,<sup>1,2</sup> and these pathways can have cooperative or counteracting effects through the genes that they regulate.

### *Bone Morphogenetic Proteins in Barrett's Esophagus and Esophageal Cancer*

BMP4 and BMP5 have also been implicated in BE and EAC. Patients with BE have significantly increased plasma concentrations of BMP5, which may serve as a blood biomarker for screening high-risk BE populations.<sup>3</sup> BE and EAC tissue have increased BMP4 signaling and studies with cultured BE and EAC cell lines suggest that this pathway promotes EMT by induction of *SNAIL2*.<sup>4</sup>

### *Bone Morphogenetic Proteins in Gastritis, Infection, and Gastric Cancer*

Studies in mice indicate that impaired BMP4 signaling in parietal cells and LGR5-positive stem cells stimulates epithelial stem cells, epithelial remodeling, and metaplasia in response to inflammation triggered by *H pylori* infection.<sup>5,6</sup> Studies with mice and cultured cells show that BMP4 signaling in gastric epithelial cells inhibits the release of inflammatory mediators and reduces inflammation.<sup>7</sup>

Alterations in BMP signaling are associated with metastasis of GC. BMP4 is frequently overexpressed in GC both at the messenger RNA and protein levels; high amounts of BMP4 correlate with poor prognosis.<sup>8</sup> Mechanistically, BMP4 promotes EMT and invasive properties of GC cells. Studies with cultured endothelial cells show that suppression of autocrine TGF- $\beta$  signaling in endothelial cells by the transcription factor GATA6 increases endothelial cell survival and angiogenic activity by shifting the balance of signals from those mediated by SMAD2 and SMAD3, activated by the TGF- $\beta$  subfamily, to those mediated by SMAD1 and SMAD5, activated by BMP9 and BMP10.<sup>9</sup>

Amplification of *GATA6*, *GATA4*, or *KLF5* is common in GC, and amplification of 1 is sufficient to induce the expression of the other 2, thereby promoting tumorigenesis.<sup>10</sup> A mouse study connected the complex formed by these 3 transcription factors to a feed-forward differentiation mechanism activated by multiple BMPs (BMP1, BMP2, and BMP8).<sup>11</sup> Whether disruption of this pathway contributes to GC is unknown. Lymph node metastasis of GC is significantly associated with high amounts of phosphorylated SMAD2.<sup>12</sup>

### *Bone Morphogenetic Proteins in Hereditary Colon Cancer Syndromes*

Many cases of CRC have a strong hereditary component; most have mutations that hyperactivate Wnt/ $\beta$ -catenin

signaling, such as mutations in *APC*. However, mutations in *BMPR1A* and *SMAD4* cause familial juvenile polyposis syndrome, which is primarily a disease characterized by benign gastric and intestinal polyps. Both patients with and without these mutations and who have disease-causing mutations in either *BMPR1A* or *SMAD4* had increased risk of developing GI adenomas.<sup>13</sup> Mice with stromal-specific knockout of *BMPR2* develop intestinal polyps that are associated with increased epithelial cell proliferation and reduced apoptosis and that have increased numbers of myofibroblasts in the lamina propria. However, these mice do not spontaneously develop adenocarcinomas.<sup>14</sup> Other hereditary forms of CRC include individuals with Lynch syndrome, which is also known as hereditary nonpolyposis CRC. CRC in individuals with Lynch syndrome have the CSM3 type CRC; this syndrome results from autosomal-dominant germline mutations in genes encoding proteins involved in DNA mismatch repair MLH1, MSH2, MSH6, and PMS2.<sup>15</sup> Mutations or changes in gene expression that co-occur in CRC of patients with Lynch syndrome or MSI include *ACVR2* (encoding a type II receptor for BMPs),<sup>16</sup> *TGFBR2*,<sup>16-18</sup> and *TGFBR1*.<sup>19</sup> Thus, altered signaling by BMPs or the TGF- $\beta$  subfamily is likely a contributing factor in the progression to cancer.

### *Bone Morphogenetic Proteins in Nonalcoholic Fatty Liver Disease, Nonalcoholic Steatohepatitis, and Hepatocellular Carcinoma*

Only a few BMPs have been investigated in relation to NAFLD, NASH, and HCC. In a mouse model of NAFLD, virus-mediated BMP4 overexpression in the liver reduced hepatic steatosis by inhibiting translation and stimulating lipid turnover in hepatocytes.<sup>20</sup> In contrast, BMP8, which increases with disease progression in mice and patients, contributes to hepatic stellate cell activation and limits NASH progression in mice.<sup>21</sup> In HCC, tumors with low *BMP10* expression are associated with poorer survival.<sup>22</sup> BMP9 is produced by hepatocytes.<sup>23</sup> A major role for BMP9 in the liver that is relevant for HCC is as a stimulator of angiogenesis.<sup>24</sup> Indeed, antibodies or antibody-based fusion proteins that block BMP9 binding to the receptor ALK1 (encoded by *ACVRL1*) or the co-receptor endoglin have anti-angiogenic effects,<sup>25</sup> and TRC105 and dalantercept are 2 such antibodies tested in clinical trials for HCC.<sup>26,27</sup>

## Transforming Growth Factor- $\beta$ Signaling in Celiac Disease

Celiac disease (CE) is a gluten-induced chronic small intestinal enteropathy.<sup>28,29</sup> Under normal conditions, the small intestine is a site of high concentrations of TGF- $\beta$ , which suppress Th1 differentiation, promote Treg differentiation,<sup>30</sup> and stimulate IgA production.<sup>31-33</sup> These TGF- $\beta$ -dependent immune responses prevent inflammation-induced intestinal damage (Figure 2). The effect of TGF- $\beta$  on T cells depends on both the concentration of this cytokine and the presence of other signals. In the presence of IL-6, TGF- $\beta$  induces Th17 differentiation at the expense of Treg differentiation<sup>34</sup>; without IL-6, TGF- $\beta$

diverts differentiation toward Treg cells.<sup>30-35</sup> CE is associated with a mixture of pro-inflammatory and immunosuppressive cytokines. Many of the pro-inflammatory cytokines influence the immune cell response to TGF- $\beta$ . Serum concentrations of signals that intersect with the TGF- $\beta$  pathway, including IL-6, tumor necrosis factor- $\alpha$  (TNF- $\alpha$ ), interferon (IFN)-gamma, and IL-15, are either increased in patients with active CE<sup>36</sup> or upon gluten challenge.<sup>37</sup>

In CE, expansion of T cell populations that react to peptides from the cereal proteins in the gliadin family occurs, resulting in an inflammatory Th1 response that includes production of IFN-gamma and IL-21, as well as IL-4, which is associated with Th2 cells.<sup>38,39</sup> Contradictorily, increased transcripts for genes encoding IL-10 and TGF- $\beta$ 1 are present in both the surface epithelium and lamina propria,<sup>40</sup> and these signals should limit the inflammatory Th1 response.<sup>41</sup> Similarly, the lamina propria of the intestine of patients with CE has high amounts of innate inflammatory mediators IL-15, TNF- $\alpha$ , and IFN-gamma,<sup>42,43</sup> all of which impair the immunosuppressive effects of TGF- $\beta$ .<sup>41,44,45</sup> IFN-gamma induces the expression of *SMAD7*,<sup>45</sup> and both TNF- $\alpha$  and IL-15 act through the Jun transcription factors to interfere with SMAD3-dependent gene regulation.<sup>41,44</sup> This apparent paradoxical milieu of both pro-inflammatory and immunosuppressive cytokines may reflect the body's attempt to counterbalance the abnormal immune activation that occurs in CE. Although patients with CE have a 14-fold higher risk of developing small bowel adenocarcinoma,<sup>46,47</sup> this represents <1% of GI cancers in the United States.

### Supplementary References

- Koinuma D, Shinozaki M, Komuro A, et al. Arkadia amplifies TGF-beta superfamily signalling through degradation of Smad7. *EMBO J* 2003;22:6458-6470.
- Chen YG, Hata A, Lo RS, et al. Determinants of specificity in TGF-beta signal transduction. *Genes Dev* 1998;12:2144-2152.
- Correia ACP, Calpe S, Mostafavi N, et al. Detection of circulating BMP5 as a risk factor for Barrett's esophagus. *Sci Rep* 2020;10:15579.
- Kestens C, Siersema PD, Offerhaus GJA, et al. BMP4 signaling is able to induce an epithelial-mesenchymal transition-like phenotype in Barrett's esophagus and esophageal adenocarcinoma through induction of SNAIL2. *PLoS One* 2016;11:e0155754-e0155754.
- Todisco A. Regulation of gastric metaplasia, dysplasia, and neoplasia by bone morphogenetic protein signaling. *Cell Mol Gastroenterol Hepatol* 2017;3:339-347.
- Ye W, Takabayashi H, Yang Y, et al. Regulation of gastric Lgr5+ve cell homeostasis by bone morphogenetic protein (BMP) signaling and inflammatory stimuli. *Cell Mol Gastroenterol Hepatol* 2018;5:523-538.
- Takabayashi H, Shinohara M, Mao M, et al. Anti-inflammatory activity of bone morphogenetic protein signaling pathways in stomachs of mice. *Gastroenterology* 2014;147:396-406.e7.
- Deng G, Chen Y, Guo C, et al. BMP4 promotes the metastasis of gastric cancer by inducing epithelial-mesenchymal transition via ID1. *J Cell Sci* 2020;133.
- Froese N, Kattih B, Breitbart A, et al. GATA6 promotes angiogenic function and survival in endothelial cells by suppression of autocrine transforming growth factor beta/activin receptor-like kinase 5 signaling. *J Biol Chem* 2011;286:5680-5690.
- Chia NY, Deng N, Das K, et al. Regulatory crosstalk between lineage-survival oncogenes KLF5, GATA4 and GATA6 cooperatively promotes gastric cancer development. *Gut* 2015;64:707-719.
- Chen L, Toke NH, Luo S, et al. A reinforcing HNF4-SMAD4 feed-forward module stabilizes enterocyte identity. *Nat Genet* 2019;51:777-785.
- Shinto O, Yashiro M, Toyokawa T, et al. Phosphorylated smad2 in advanced stage gastric carcinoma. *BMC Cancer* 2010;10:652.
- MacFarland SP, Ebrahimzadeh JE, Zellek K, et al. Phenotypic differences in juvenile polyposis syndrome with or without a disease-causing SMAD4/BMPRI1A variant. *Cancer Prev Res (Phila)* 2021;14:215-222.
- Beppu H, Mwirerwa ON, Beppu Y, et al. Stromal inactivation of BMPRII leads to colorectal epithelial overgrowth and polyp formation. *Oncogene* 2008;27:1063-1070.
- Ma Y, Chen Y, Petersen I. Expression and promoter DNA methylation of MLH1 in colorectal cancer and lung cancer. *Pathol Res Pract* 2017;213:333-338.
- Jung B, Doctolero RT, Tajima A, et al. Loss of activin receptor type 2 protein expression in microsatellite unstable colon cancers. *Gastroenterology* 2004;126:654-659.
- Markowitz S, Wang J, Myeroff L, et al. Inactivation of the type II TGF-beta receptor in colon cancer cells with microsatellite instability. *Science* 1995;268:1336-1338.
- Parsons R, Myeroff LL, Liu B, et al. Microsatellite instability and mutations of the transforming growth factor beta type ii receptor gene in colorectal cancer. *Cancer Res* 1995;55:5548-5550.
- Pasche B, Kaklamani V, Hou N, et al. TGFBR1\*6A and cancer: a meta-analysis of 12 case-control studies. *J Clin Oncol* 2004;22:756-758.
- Peng Q, Chen B, Wang H, et al. Bone morphogenetic protein 4 (BMP4) alleviates hepatic steatosis by increasing hepatic lipid turnover and inhibiting the mTORC1 signaling axis in hepatocytes. *Aging (Albany NY)* 2019;11:11520-11540.
- Vacca M, Leslie J, Virtue S, et al. Bone morphogenetic protein 8B promotes the progression of non-alcoholic steatohepatitis. *Nat Metab* 2020;2:514-531.
- Yuan Y-M, Ma N, Zhang E-B, et al. BMP10 suppresses hepatocellular carcinoma progression via PTPRS-STAT3 axis. *Oncogene* 2019;38:7281-7293.
- Bidart M, Ricard N, Lrevet S, et al. BMP9 is produced by hepatocytes and circulates mainly in an active mature form complexed to its prodomain. *Cell Mol Life Sci* 2012;69:313-324.
- Suzuki Y, Ohga N, Morishita Y, et al. BMP-9 induces proliferation of multiple types of endothelial cells in vitro and in vivo. *J Cell Sci* 2010;123:1684-1692.

25. Cunha SI, Pardali E, Thorikay M, et al. Genetic and pharmacological targeting of activin receptor-like kinase 1 impairs tumor growth and angiogenesis. *J Exp Med* 2010;207:85–100.
26. Duffy AG, Ma C, Ulahannan SV, et al. Phase I and preliminary phase II study of TRC105 in combination with sorafenib in hepatocellular carcinoma. *Clin Cancer Res* 2017;23:4633–4641.
27. Abou-Alfa GK, Miksad RA, Tejani MA, et al. A phase Ib, open-label study of dalantercept, an activin receptor-like kinase 1 ligand trap, plus sorafenib in advanced hepatocellular carcinoma. *Oncologist* 2019;24:161–e170.
28. Tye-Din JA, Galipeau HJ, Agardh D. Celiac disease: a review of current concepts in pathogenesis, prevention, and novel therapies. *Front Pediatr* 2018;6:350.
29. Hujuel IA, Reilly NR, Rubio-Tapia A. Celiac disease: clinical features and diagnosis. *Gastroenterol Clin North Am* 2019;48:19–37.
30. Chen W, Jin W, Hardegen N, et al. Conversion of peripheral CD4+CD25- naive T cells to CD4+CD25+ regulatory T cells by TGF-beta induction of transcription factor Foxp3. *J Exp Med* 2003;198:1875–1886.
31. Honda K, Littman DR. The microbiome in infectious disease and inflammation. *Annu Rev Immunol* 2012;30:759–795.
32. Gorelik L, Flavell RA. Transforming growth factor- $\beta$  in T-cell biology. *Nat Rev Immunol* 2002;2:46–53.
33. Cazac BB, Roes J. TGF- $\beta$  receptor controls B cell responsiveness and induction of IgA in vivo. *Immunity* 2000;13:443–451.
34. Bettelli E, Carrier Y, Gao W, et al. Reciprocal developmental pathways for the generation of pathogenic effector TH17 and regulatory T cells. *Nature* 2006;441:235–238.
35. Zhou L, Lopes JE, Chong MMW, et al. TGF- $\beta$ -induced Foxp3 inhibits T H 17 cell differentiation by antagonizing ROR $\gamma$ t function. *Nature* 2008;453:236–240.
36. Vorobjova T, Tagoma A, Oras A, et al. Celiac disease in children, particularly with accompanying type 1 diabetes, is characterized by substantial changes in the blood cytokine balance, which may reflect inflammatory processes in the small intestinal mucosa. *J Immunol Res* 2019;2019:6179243.
37. Goel G, Daveson AJM, Hooi CE, et al. Serum cytokines elevated during gluten-mediated cytokine release in celiac disease. *Clin Exp Immunol* 2020;199:68–78.
38. Troncone R, Gianfrani C, Mazzarella G, et al. Majority of gliadin-specific T-cell clones from celiac small intestinal mucosa produce interferon-gamma and interleukin-4. *Dig Dis Sci* 1998;43:156–161.
39. Fina D, Sarra M, Caruso R, et al. Interleukin 21 contributes to the mucosal T helper cell type 1 response in celiac disease. *Gut* 2008;57:887–892.
40. Iacomino G, Marano A, Stillitano I, et al. Celiac disease: role of intestinal compartments in the mucosal immune response. *Mol Cell Biochem* 2016;411:341–349.
41. Lahdenperä AI, Hölttä V, Ruohtula T, et al. Up-regulation of small intestinal interleukin-17 immunity in untreated celiac disease but not in potential celiac disease or in type 1 diabetes. *Clin Exp Immunol* 2012;167:226–234.
42. Maiuri L, Ciacci C, Ricciardelli I, et al. Association between innate response to gliadin and activation of pathogenic T cells in coeliac disease. *Lancet* 2003;362:30–37.
43. Marafini I, Monteleone I, Fusco DD, et al. TNF- $\alpha$  producing innate lymphoid cells (ILCs) are increased in active celiac disease and contribute to promote intestinal atrophy in mice. *PLOS ONE* 2015;10:e0126291.
44. Verrecchia F, Pessah M, Atfi A, et al. Tumor necrosis factor-alpha inhibits transforming growth factor-beta /Smad signaling in human dermal fibroblasts via AP-1 activation. *J Biol Chem* 2000;275:30226–30231.
45. Ulloa L, Doody J, Massagué J. Inhibition of transforming growth factor- $\beta$ /SMAD signalling by the interferon- $\gamma$ /STAT pathway. *Nature* 1999;397:710–713.
46. Aparicio T, Zaanan A, Svrcek M, et al. Small bowel adenocarcinoma: epidemiology, risk factors, diagnosis and treatment. *Dig Liver Dis* 2014;46:97–104.
47. Han Y, Chen W, Li P, et al. Association between celiac disease and risk of any malignancy and gastrointestinal malignancy: a meta-analysis. *Medicine (Baltimore)* 2015;94:e1612.
48. Kulkarni AB, Huh CG, Becker D, et al. Transforming growth factor beta 1 null mutation in mice causes excessive inflammatory response and early death. *Proc Natl Acad Sci U S A* 1993;90:770–774.
49. Gorham JD, Lin JT, Sung JL, et al. Genetic regulation of autoimmune disease: BALB/c background TGF-beta 1-deficient mice develop necroinflammatory IFN-gamma-dependent hepatitis. *J Immunol* 2001;166:6413–6422.
50. Cripps JG, Celaj S, Burdick M, et al. Liver inflammation in a mouse model of Th1 hepatitis despite the absence of invariant NKT cells or the Th1 chemokine receptors CXCR3 and CCR5. *Lab Invest* 2012;92:1461–1471.
51. Engle SJ, Hoying JB, Boivin GP, et al. Transforming growth factor beta1 suppresses nonmetastatic colon cancer at an early stage of tumorigenesis. *Cancer Res* 1999;59:3379–3386.
52. Boomershine CS, Chamberlain A, Kendall P, et al. Autoimmune pancreatitis results from loss of TGFbeta signalling in S100A4-positive dendritic cells. *Gut* 2009;58:1267–1274.
53. Wei HX, Chuang YH, Li B, et al. CD4+ CD25+ Foxp3+ regulatory T cells protect against T cell-mediated fulminant hepatitis in a TGF-beta-dependent manner in mice. *J Immunol* 2008;181:7221–7229.
54. Moritoki Y, Zhang W, Tsuneyama K, et al. B cells suppress the inflammatory response in a mouse model of primary biliary cirrhosis. *Gastroenterology* 2009;136:1037–1047.
55. Chytil A, Magnuson MA, Wright CV, et al. Conditional inactivation of the TGF-beta type II receptor using Cre: Lox. *Genesis* 2002;32:73–75.
56. Smits R, van der Hoven van Oordt W, Luz A, et al. Apc1638N: a mouse model for familial adenomatous polyposis-associated desmoid tumors and cutaneous cysts. *Gastroenterology* 1998;114:275–283.

57. Sakai E, Nakayama M, Oshima H, et al. Combined mutation of *Apc*, *Kras*, and *Tgfr2* effectively drives metastasis of intestinal cancer. *Cancer Res* 2018; 78:1334–1346.
58. Oshima M, Oshima H, Kitagawa K, et al. Loss of *Apc* heterozygosity and abnormal tissue building in nascent intestinal polyps in mice carrying a truncated *Apc* gene. *Proc Natl Acad Sci U S A* 1995;92:4482–4486.
59. Trobridge P, Knoblaugh S, Washington MK, et al. TGF- $\beta$  receptor inactivation and mutant *Kras* induce intestinal neoplasms in mice via a beta-catenin-independent pathway. *Gastroenterology* 2009; 136:1680–1688.e7.
60. Byun DS, Ahmed N, Nasser S, et al. Intestinal epithelial-specific PTEN inactivation results in tumor formation. *Am J Physiol Gastrointest Liver Physiol* 2011; 301:G856–G864.
61. Yu M, Trobridge P, Wang Y, et al. Inactivation of TGF- $\beta$  signaling and loss of PTEN cooperate to induce colon cancer in vivo. *Oncogene* 2014;33:1538–1547.
62. Biswas S, Chytil A, Washington K, et al. Transforming growth factor beta receptor type II inactivation promotes the establishment and progression of colon cancer. *Cancer Res* 2004;64:4687–4692.
63. Saam JR, Gordon JL. Inducible gene knockouts in the small intestinal and colonic epithelium. *J Biol Chem* 1999;274:38071–38082.
64. Sakai K, Jawaid S, Sasaki T, et al. Transforming growth factor- $\beta$ -independent role of connective tissue growth factor in the development of liver fibrosis. *Am J Pathol* 2014;184:2611–2617.
65. Kühn R, Schwenk F, Aguet M, et al. Inducible gene targeting in mice. *Science* 1995;269:1427–1429.
66. Morris SM, Carter KT, Baek JY, et al. TGF- $\beta$  signaling alters the pattern of liver tumorigenesis induced by *Pten* inactivation. *Oncogene* 2015;34:3273–3282.
67. Lesche R, Groszer M, Gao J, et al. *Cre/loxP*-mediated inactivation of the murine *Pten* tumor suppressor gene. *Genesis* 2002;32:148–149.
68. Jackson EL, Willis N, Mercer K, et al. Analysis of lung tumor initiation and progression using conditional expression of oncogenic *K-ras*. *Genes Dev* 2001; 15:3243–3248.
69. Vacca M, Leslie J, Virtue S, et al. Bone morphogenetic protein 8B promotes the progression of non-alcoholic steatohepatitis. *Nat Metab* 2020;2:514–531.
70. Zhao GQ, Deng K, Labosky PA, et al. The gene encoding bone morphogenetic protein 8B is required for the initiation and maintenance of spermatogenesis in the mouse. *Genes Dev* 1996;10:1657–1669.
71. Ji T, Takabayashi H, Mao M, et al. Regulation and function of bone morphogenetic protein signaling in colonic injury and inflammation. *Am J Physiol Gastrointest Liver Physiol* 2017;312:G24–G33.
72. Mishina Y, Hanks MC, Miura S, et al. Generation of *Bmpr/Alk3* conditional knockout mice. *Genesis* 2002; 32:69–72.
73. Allaire JM, Roy SA, Ouellet C, et al. *Bmp* signaling in colonic mesenchyme regulates stromal microenvironment and protects from polyposis initiation. *Int J Cancer* 2016;138:2700–2712.
74. He XC, Zhang J, Tong WG, et al. BMP signaling inhibits intestinal stem cell self-renewal through suppression of Wnt-beta-catenin signaling. *Nat Genet* 2004;36:1117–1121.
75. Ye W, Takabayashi H, Yang Y, et al. Regulation of gastric *Lgr5*+ve cell homeostasis by bone morphogenetic protein (BMP) signaling and inflammatory stimuli. *Cell Mol Gastroenterol Hepatol* 2018;5:523–538.
76. Ju W, Ogawa A, Heyer J, et al. Deletion of *Smad2* in mouse liver reveals novel functions in hepatocyte growth and differentiation. *Mol Cell Biol* 2006;26:654–667.
77. Ashcroft GS, Yang X, Glick AB, et al. Mice lacking *Smad3* show accelerated wound healing and an impaired local inflammatory response. *Nat Cell Biol* 1999;1:260–266.
78. Hamamoto T, Beppu H, Okada H, et al. Compound disruption of *smad2* accelerates malignant progression of intestinal tumors in *apc* knockout mice. *Cancer Res* 2002;62:5955–5961.
79. Shibata H, Toyama K, Shioya H, et al. Rapid colorectal adenoma formation initiated by conditional targeting of the *Apc* gene. *Science* 1997;278:120–123.
80. Nam KT, O’Neal R, Lee YS, et al. Gastric tumor development in *Smad3*-deficient mice initiates from forestomach/glandular transition zone along the lesser curvature. *Lab Invest* 2012;92:883–895.
81. Latella G, Vetuschi A, Sferra R, et al. Targeted disruption of *Smad3* confers resistance to the development of dimethylnitrosamine-induced hepatic fibrosis in mice. *Liver Int* 2009;29:997–1009.
82. Su LK, Kinzler KW, Vogelstein B, et al. Multiple intestinal neoplasia caused by a mutation in the murine homolog of the APC gene. *Science* 1992;256:668–670.
83. Moser AR, Luongo C, Gould KA, et al. *ApcMin*: a mouse model for intestinal and mammary tumorigenesis. *Eur J Cancer* 1995;31a:1061–1064.
84. Allaire JM, Darsigny M, Marcoux SS, et al. Loss of *Smad5* leads to the disassembly of the apical junctional complex and increased susceptibility to experimental colitis. *Am J Physiol Gastrointest Liver Physiol* 2011; 300:G586–G597.
85. Umans L, Vermeire L, Francis A, et al. Generation of a floxed allele of *Smad5* for cre-mediated conditional knockout in the mouse. *Genesis* 2003;37:5–11.
86. Teng Y, Sun AN, Pan XC, et al. Synergistic function of *Smad4* and PTEN in suppressing forestomach squamous cell carcinoma in the mouse. *Cancer Res* 2006; 66:6972–6981.
87. Yang X, Li C, Herrera PL, et al. Generation of *Smad4/Dpc4* conditional knockout mice. *Genesis* 2002;32:80–81.
88. Suzuki A, Itami S, Ohishi M, et al. Keratinocyte-specific *Pten* deficiency results in epidermal hyperplasia, accelerated hair follicle morphogenesis and tumor formation. *Cancer Res* 2003;63:674–681.

89. Xu X, Brodie SG, Yang X, et al. Haploid loss of the tumor suppressor Smad4/Dpc4 initiates gastric polyposis and cancer in mice. *Oncogene* 2000;19:1868–1874.
90. Redman RS, Katuri V, Tang Y, et al. Orofacial and gastrointestinal hyperplasia and neoplasia in smad4<sup>+/-</sup> and elf<sup>+/-</sup>/smad4<sup>+/-</sup> mutant mice. *J Oral Pathol Med* 2005;34:23–29.
91. Yang X, Li C, Xu X, et al. The tumor suppressor SMAD4/DPC4 is essential for epiblast proliferation and mesoderm induction in mice. *Proc Natl Acad Sci U S A* 1998;95:3667–3672.
92. Hohenstein P, Molenaar L, Elsinga J, et al. Serrated adenomas and mixed polyposis caused by a splice acceptor deletion in the mouse Smad4 gene. *Genes Chromosomes Cancer* 2003;36:273–282.
93. Fodde R, Edelmann W, Yang K, et al. A targeted chain-termination mutation in the mouse Apc gene results in multiple intestinal tumors. *Proc Natl Acad Sci U S A* 1994;91:8969–8973.
94. Kitamura T, Kometani K, Hashida H, et al. SMAD4-deficient intestinal tumors recruit CCR1<sup>+</sup> myeloid cells that promote invasion. *Nat Genet* 2007;39:467–475.
95. Takaku K, Oshima M, Miyoshi H, et al. Intestinal tumorigenesis in compound mutant mice of both Dpc4 (Smad4) and Apc genes. *Cell* 1998;92:645–656.
96. Xu X, Kobayashi S, Qiao W, et al. Induction of intrahepatic cholangiocellular carcinoma by liver-specific disruption of Smad4 and Pten in mice. *J Clin Invest* 2006;116:1843–1852.
97. Izeradjene K, Combs C, Best M, et al. Kras(G12D) and Smad4/Dpc4 haploinsufficiency cooperate to induce mucinous cystic neoplasms and invasive adenocarcinoma of the pancreas. *Cancer Cell* 2007;11:229–243.
98. Kojima K, Vickers SM, Adsay NV, et al. Inactivation of Smad4 accelerates Kras(G12D)-mediated pancreatic neoplasia. *Cancer Res* 2007;67:8121–8130.
99. Xu X, Ehdaie B, Ohara N, et al. Synergistic action of Smad4 and Pten in suppressing pancreatic ductal adenocarcinoma formation in mice. *Oncogene* 2010;29:674–686.
100. Zhu L, Wang L, Wang X, et al. Hepatic deletion of Smad7 in mouse leads to spontaneous liver dysfunction and aggravates alcoholic liver injury. *PLoS One* 2011;6:e17415.
101. Rizzo A, Waldner MJ, Stolfi C, et al. Smad7 expression in T cells prevents colitis-associated cancer. *Cancer Res* 2011;71:7423–7432.
102. Dominitzki S, Fantini MC, Neufert C, et al. Cutting edge: trans-signaling via the soluble IL-6R abrogates the induction of FoxP3 in naive CD4<sup>+</sup>CD25<sup>+</sup> T cells. *J Immunol* 2007;179:2041–2045.
103. Li R, Rosendahl A, Brodin G, et al. Deletion of exon I of SMAD7 in mice results in altered B cell responses. *J Immunol* 2006;176:6777–6784.
104. Kleiter I, Song J, Lukas D, et al. Smad7 in T cells drives T helper 1 responses in multiple sclerosis and experimental autoimmune encephalomyelitis. *Brain* 2010;133:1067–1081.
105. Mishra B, Tang Y, Katuri V, et al. Loss of cooperative function of transforming growth factor-beta signaling proteins, smad3 with embryonic liver fodrin, a beta-spectrin, in primary biliary cirrhosis. *Liver Int* 2004;24:637–645.
106. Petrasek J, Erhartova D, Levine B. Protective effect of SMAD-specific E3 ubiquitin protein ligase 1 in alcoholic steatohepatitis in mice. *Hepatology* 2019;3:1450–1458.
107. Zhu K, Tang Y, Xu X, et al. Non-proteolytic ubiquitin modification of PPAR $\gamma$  by Smurf1 protects the liver from steatosis. *PLoS Biol* 2018;16:e3000091.
108. Kim KH, Kim SH, Han DH, et al. Growth differentiation factor 15 ameliorates nonalcoholic steatohepatitis and related metabolic disorders in mice. *Sci Rep* 2018;8:6789.
109. Zimmers TA, Jin X, Gutierrez JC, et al. Effect of in vivo loss of GDF-15 on hepatocellular carcinogenesis. *J Cancer Res Clin Oncol* 2008;134:753–759.
110. Hsiao EC, Koniaris LG, Zimmers-Koniaris T, et al. Characterization of growth-differentiation factor 15, a transforming growth factor beta superfamily member induced following liver injury. *Mol Cell Biol* 2000;20:3742–3751.
111. Jin L, Vu T, Yuan G, et al. STRAP promotes stemness of human colorectal cancer via epigenetic regulation of the NOTCH pathway. *Cancer Res* 2017;77:5464–5478.
112. Jin L, Chang C, Pawlik KM, et al. Serine threonine kinase receptor-associated protein deficiency impairs mouse embryonic stem cells lineage commitment through CYP26A1-mediated retinoic acid homeostasis. *Stem Cells* 2018;36:1368–1379.
113. Hinck AP, Mueller TD, Springer TA. Structural biology and evolution of the TGF- $\beta$  family. *Cold Spring Harb Perspect Biol* 2016;8(12):a022103.
114. David CJ, Massagué J. Contextual determinants of TGF $\beta$  action in development, immunity and cancer. *Nat Rev Mol Cell Biol* 2018;19:419–435.
115. Battle E, Massagué J. Transforming growth factor- $\beta$  signaling in immunity and cancer. *Immunity* 2019;50:924–940.
116. Frangogiannis NG. Transforming growth factor- $\beta$  in tissue fibrosis. *J Exp Med* 2020:217.
117. Mishra L, Derynck R, Mishra B. Transforming growth factor- $\beta$  signaling in stem cells and cancer. *Science* 2005;310:68–71.
118. Liu S, Ren J, Ten Dijke P. Targeting TGF $\beta$  signal transduction for cancer therapy. *Signal Transduct Target Ther* 2021;6:8.
119. Bhowmick NA, Neilson EG, Moses HL. Stromal fibroblasts in cancer initiation and progression. *Nature* 2004;432:332–337.
120. Gorelik L, Flavell RA. Transforming growth factor- $\beta$  in T-cell biology. *Nat Rev Immunol* 2002;2:46–53.
121. Zhang W, Wang DH. Origins of metaplasia in Barrett's esophagus: is this an esophageal stem or progenitor cell disease? *Dig Dis Sci* 2018;63:2005–2012.
122. Rubenstein JH. Risk factors for Barrett's esophagus. *Curr Opin in Gastroenterology* 2014;30:408–414.

123. Kim J, Bowlby R, Mungall AJ, et al. Integrated genomic characterization of oesophageal carcinoma. *Nature* 2017;541:169–175.
124. Cader MZ, Kaser A. Recent advances in inflammatory bowel disease: mucosal immune cells in intestinal inflammation. *Gut* 2013;62:1653–1664.
125. Rieder F, Fiocchi C, Rogler G. Mechanisms, management, and treatment of fibrosis in patients with inflammatory bowel diseases. *Gastroenterology* 2017;152:340–350.e6.
126. Brennan CA, Garrett WS. Gut microbiota, inflammation, and colorectal cancer. *Ann Rev Microbiol* 2016;70:395–411.
127. Jung B, Staudacher JJ, Beauchamp D. Transforming growth factor  $\beta$  superfamily signaling in development of colorectal cancer. *Gastroenterology* 2017;152:36–52.
128. Guinney J, Dienstmann R, Wang X, et al. The consensus molecular subtypes of colorectal cancer. *Nat Med* 2015;21:1350–1356.
129. Zhan T, Rindtorff N, Boutros M. Wnt signaling in cancer. *Oncogene* 2017;36:1461–1473.
130. Friedman SL, Neuschwander-Tetri BA, Rinella M, et al. Mechanisms of NAFLD development and therapeutic strategies. *Nat Med* 2018;24:908–922.
131. Tsuchida T, Friedman SL. Mechanisms of hepatic stellate cell activation. *Nat Rev Gastroenterol Hepatol* 2017;14:397–411.
132. Schuster S, Cabrera D, Arrese M, et al. Triggering and resolution of inflammation in NASH. *Nat Rev Gastroenterol Hepatol* 2018;15:349–364.
133. Fabregat I, Moreno-Càceres J, Sánchez A, et al. TGF- $\beta$  signalling and liver disease. *FEBS J* 2016;283:2219–2232.
134. Dituri F, Mancarella S, Cigliano A, et al. TGF- $\beta$  as multifaceted orchestrator in HCC progression: signaling, EMT, immune microenvironment, and novel therapeutic perspectives. *Semin Liver Dis* 2019;39:053–069.
135. Giannelli G, Mikulits W, Dooley S, et al. The rationale for targeting TGF- $\beta$  in chronic liver diseases. *European Journal of Clinical Investigation* 2016;46:349–361.
136. Iacobuzio-Donahue CA. Genetic evolution of pancreatic cancer: lessons learnt from the pancreatic cancer genome sequencing project. *Gut* 2012;61:1085–1094.
137. Kleeff J, Korc M, Apte M, et al. Pancreatic cancer. *Nat Rev Dis Primers* 2016;2:1–22.
138. Orth M, Metzger P, Gerum S, et al. Pancreatic ductal adenocarcinoma: biological hallmarks, current status, and future perspectives of combined modality treatment approaches. *Radiats Oncol* 2019;14:141.

**Supplementary Table 1.** Comprehensive List of Mouse Models for Studying the Roles of Transforming Growth Factor- $\beta$  and Bone Morphogenetic Protein Signaling in Digestive Diseases and Cancers

| Gene (and function)                                                                                                                                                  | Mice model                                                                                                         | Disease relevance                                                                                          | Model design                                                                          | Model phenotype                                                                                                             | Reference no. |
|----------------------------------------------------------------------------------------------------------------------------------------------------------------------|--------------------------------------------------------------------------------------------------------------------|------------------------------------------------------------------------------------------------------------|---------------------------------------------------------------------------------------|-----------------------------------------------------------------------------------------------------------------------------|---------------|
| <i>TGFB1</i> (ligand)                                                                                                                                                | <i>Tgfb1</i> <sup>+/-</sup><br><i>TGFB1</i> heterozygosity<br>(C57B1/6 NCr)                                        | Liver cancer                                                                                               | Disruption of <i>TGFB1</i> exon 1 and intron 1 with neomycin-resistance cassette      | By 6 mo, mice have increased susceptibility to chemically induced liver cancer.                                             | 96            |
|                                                                                                                                                                      | <i>Tgfb1</i> <sup>-/-</sup><br>Immunocompetent <i>TGFB1</i> knockout<br>(C3H/HeN $\times$ C57BL/6J)                | Inflammation, IBD                                                                                          | Disruption of <i>TGFB1</i> exon 6 with neomycin-resistance cassette                   | By 3 wk, mice die from a wasting syndrome with multifocal, mixed inflammatory cell response, and tissue necrosis.           | 32, 48        |
|                                                                                                                                                                      | <i>Tgfb1</i> <sup>-/-</sup><br>Immunocompetent <i>TGFB1</i> knockout (Balb/c)                                      | Hepatitis                                                                                                  | Disruption of <i>TGFB1</i> exon 6 with neomycin-resistance cassette                   | Mice spontaneously develop IFN-gamma-dependent necroinflammation of the liver.                                              | 49, 50        |
|                                                                                                                                                                      | <i>TGF-<math>\beta</math></i> <sup>ADC</sup><br>DC-specific <i>TGFB1</i> knockout<br>(C57BL6)                      | Gastritis                                                                                                  | Disruption of <i>TGFB1</i> exon 6 with cCD11c-Cre driving DC-specific knockout        | After 6 mo of <i>Helicobacter felis</i> infection, mice develop severe gastritis, with a trend toward increased metaplasia. | 17            |
|                                                                                                                                                                      | <i>CD4-Cre/Tgfb1</i> <sup>fl/fl</sup><br>T cell-specific <i>TGFB1</i> knockout<br>(C57BL/6)                        | IBD                                                                                                        | LoxP sites flanking <i>TGFB1</i> exon 1 with CD4-Cre driving T cell-specific knockout | By 4–12 mo, mice developed inflammatory disorder and severe colitis.                                                        | 36            |
|                                                                                                                                                                      | <i>Tgfb1</i> <sup>-/- Rag2</sup> <sup>-/-</sup><br>Immunodeficient <i>TGFB1</i> knockout (129S6 $\times$ CF-1)     | CRC                                                                                                        | Disruption of <i>TGFB1</i> exon 6 with neomycin-resistance cassette                   | By 5 mo, all mice develop severe hyperplasia and nonmetastatic carcinoma in the cecum and colon.                            | 59, 51        |
|                                                                                                                                                                      | PF4Cre <i>Tgfb1</i> <sup>fl/fl</sup><br>Platelet-specific <i>TGFB1</i> knockout<br>(C57BL/6)                       | Liver fibrosis                                                                                             | LoxP sites flanking <i>TGFB1</i> exon 6, with PF4-Cre driving deletion in platelets   | Mice develop less liver fibrosis in response to chemically induced liver damage.                                            | 83            |
|                                                                                                                                                                      | <i>Alb/TGF-<math>\beta</math>1</i><br>Liver-specific expression of TGF- $\beta$ 1 (C57BL/6 $\times$ CBA/J)         | Liver cancer                                                                                               | Porcine <i>TGFB1</i> expressed from <i>albumin</i> promoter                           | By 16–18 mo, ~60% of mice spontaneously develop HCC                                                                         | 101           |
|                                                                                                                                                                      | <i>myc/TGF-<math>\beta</math>1</i><br>Liver-specific expression of MYC and TGF- $\beta$ 1 (C57BL/6 $\times$ CBA/J) | Liver cancer                                                                                               | MYC and porcine <i>TGFB1</i> expressed from <i>albumin</i> promoter                   | By 13 mo, 100% of mice develop multifocal tumors in different lobes of the liver.                                           | 101           |
| <i>Alb-TGF-<math>\beta</math>1/ LFABP-cyclin D1</i><br>Liver-specific expression of TGF- $\beta$ 1 and multi-tissue expression of cyclin D1 (B6CBA $\times$ C57BL/6) | Liver cancer                                                                                                       | Porcine <i>TGFB1</i> expressed from <i>albumin</i> promoter and <i>CCND1</i> expressed from LFABP promoter | By 12 mo, 69% of mice develop liver cancer or high-grade tumors.                      | 102                                                                                                                         |               |

Supplementary Table 1. Continued

| Gene (and function)                                                 | Mice model                                                                                                                                                                              | Disease relevance                           | Model design                                                                                                                                                              | Model phenotype                                                                                                                                           | Reference no. |
|---------------------------------------------------------------------|-----------------------------------------------------------------------------------------------------------------------------------------------------------------------------------------|---------------------------------------------|---------------------------------------------------------------------------------------------------------------------------------------------------------------------------|-----------------------------------------------------------------------------------------------------------------------------------------------------------|---------------|
| <i>TGFBR2</i> (Type II receptor subunit for TGF-β1, TGF-β2, TGF-β3) | <i>Tgfb2</i> <sup>fspKO</sup><br><i>TGFBR2</i> knockout specifically in cells positive for S100A4 (DBA× Balb/c× C57BL/6)                                                                | Pancreatitis, esophageal and GC             | LoxP sites flanking <i>TGFBR2</i> exon 2, with FSP1-Cre driving deletion in multiple cells of mesenchymal origin, including DCs and stromal fibroblasts                   | By 6 wk, mice spontaneously develop autoimmune pancreatitis. By 7 wk, all mice spontaneously develop invasive squamous cell carcinoma of the forestomach. | 16, 52        |
|                                                                     | CRP/ΔkTβRII<br>Liver-specific expression of dominant-negative TGFBR2                                                                                                                    | Liver cancer                                | Dominant-negative TGFBR2 with <i>CRP</i> promoter driving liver-specific expression                                                                                       | Mice exhibit increased susceptibility to chemically induced multifocal preneoplastic lesions and liver cancer.                                            | 97            |
|                                                                     | CD4-dnTGFβRII<br>T cell-specific expression of dominant-negative TGFBR2 (C57BL/6 × 6XC3H)                                                                                               | IBD, hepatitis                              | Dominant-negative TGFBR2 with <i>CD4</i> promoter driving T cell-specific expression                                                                                      | By 4 mo, mice spontaneously develop IBD; mice have increased susceptibility to chemically induced liver disease.                                          | 37, 53        |
|                                                                     | <i>Igμ</i> <sup>-/-</sup> -dnTGFβRII<br>T cell-specific expression of dominant-negative TGFBR2 with B cell deficiency (C57BL/6×129S2)                                                   | IBD, biliary cirrhosis                      | Dominant-negative TGFBR2 with <i>CD4</i> promoter driving T cell-specific expression with <i>Igmu</i> knockout eliminating B cells                                        | By 5 mo, mice spontaneously develop bile duct injury and necrosis, as well as severe colitis.                                                             | 54            |
|                                                                     | DC- <i>Tgfb2</i> KO<br>DC-specific <i>TGFBR2</i> knockout (B6.129S6)                                                                                                                    | Hepatitis, pancreatitis, colitis, gastritis | Flox sites flanking <i>TGFBR2</i> exon2 with CD11c-Cre driving DC-specific deletion                                                                                       | By 15 wk, mice die of develop autoimmune inflammation in multiple organs of digestive tract.                                                              | 38            |
|                                                                     | <i>Apc</i> <sup>1638N/wt</sup> - <i>Tgfb2</i> <sup>EKO</sup><br>Intestinal epithelial cell-specific <i>TGFBR2</i> knockout with heterozygous <i>APC</i> mutation (C57BL/6Jlco × C57BL6) | CRC                                         | LoxP sites flanking <i>TGFBR2</i> exon 2, with Villin-Cre driving intestinal epithelial cell-specific deletion in the context of heterozygous <i>APC</i> loss of function | By 12 mo, all mice spontaneously develop intestinal adenocarcinoma that progresses to invasive disease.                                                   | 67, 55, 56    |
|                                                                     | <i>Apc</i> <sup>Δ716</sup> <i>Tgfb2</i> <sup>ΔIEC</sup><br>Intestinal epithelial cell-specific <i>TGFBR2</i> knockout with <i>APC</i> mutation                                          | CRC                                         | LoxP sites flanking TGFBR2 exon 2, with Villin-Cre driving intestinal epithelial cell-specific deletion in the context of <i>APC</i> mutation                             | By 15 wk, mice spontaneously develop intestinal adenocarcinomas with submucosal invasion in large polyps.                                                 | 68            |



Supplementary Table 1. Continued

| Gene (and function) | Mice model                                                                                                                                                                                                                                                                                                      | Disease relevance | Model design                                                                                                                                                                                                                                     | Model phenotype                                                                                                                        | Reference no. |
|---------------------|-----------------------------------------------------------------------------------------------------------------------------------------------------------------------------------------------------------------------------------------------------------------------------------------------------------------|-------------------|--------------------------------------------------------------------------------------------------------------------------------------------------------------------------------------------------------------------------------------------------|----------------------------------------------------------------------------------------------------------------------------------------|---------------|
|                     | <i>Apc</i> <sup>4716</sup> <i>Kras</i> <sup>G12D</sup> <i>Tgfr2</i> <sup>IEKO</sup><br>Intestinal epithelial cell-specific<br><i>TGFBR2</i> knockout with <i>APC</i><br>mutation and KRAS activation<br>(C57BL/6)                                                                                               | CRC               | LoxP sites flanking <i>TGFBR2</i> exon<br>2, with Villin-Cre driving<br>intestinal epithelial cell-<br>specific deletion and<br>expression of activating <i>KRAS</i><br>mutation in the context of <i>APC</i><br>mutation                        | By 13–16 wk, mice spontaneously<br>develop intestinal<br>adenocarcinomas that<br>progressed to invasive<br>disease.                    | 55, 57, 58    |
|                     | <i>Tgfr2</i> <sup>IEKO</sup> ;LSL- <i>Kras</i> <sup>G12D/wt</sup><br>Intestinal epithelial cell-specific<br><i>TGFBR2</i> knockout with KRAS<br>activation (C57BL/6)                                                                                                                                            | CRC               | LoxP sites flanking <i>TGFBR2</i> exon<br>2, with Villin-Cre driving<br>intestinal epithelial cell-<br>specific deletion and<br>expression of activating KRAS<br>mutant                                                                          | By 22 wk, 70% of mice<br>spontaneously develop<br>intestinal adenocarcinomas<br>with a subset developing<br>metastatic disease.        | 55, 59        |
|                     | LAKTP<br><i>Lgr5</i> <sup>eGFP-CreERT2</sup> / <i>Apc</i> <sup>Loxp</sup> /<br><i>Kras</i> <sup>LSL-G12D</sup> / <i>Tgfr2</i> <sup>Loxp</sup> /<br><i>Trp53</i> <sup>Loxp</sup><br>Intestinal stem cell-specific<br>knockout of <i>APC</i> , <i>TGFBR2</i> ,<br><i>TRP53</i> with KRAS activation<br>(C57BL/6J) | CRC               | LoxP sites flanking regions of<br><i>APC</i> , <i>TGFBR2</i> , and <i>TRP53</i><br>with inducible with <i>Lgr5</i> <sup>eGFP-<br/>CreERT2</sup> driving intestinal stem<br>cell-specific deletion and<br>expression of activating KRAS<br>mutant | Mice exhibit increased<br>susceptibility of chemically<br>induced metastatic colon<br>cancer.                                          | 71            |
|                     | <i>Pten</i> <sup>IEKO</sup> <i>Tgfr2</i> <sup>IEKO</sup><br>Intestinal epithelial cell-specific<br><i>TGFBR2</i> and <i>PTEN</i> knockout<br>(C57BL/6J)                                                                                                                                                         | CRC               | LoxP sites flanking <i>TGFBR2</i> exon<br>2 and <i>PTEN</i> exon5, Villin-Cre<br>driving intestinal epithelial cell-<br>specific deletion                                                                                                        | By 54 wk of age, 86% of mice<br>spontaneously develop<br>intestinal adenocarcinomas<br>with a subset developing<br>metastatic disease. | 55, 60, 61    |
|                     | <i>Fabp1</i> <sup>4xat-132</sup> <i>Cre</i> <i>Tgfr2</i> <sup>flx/flx</sup><br>Intestinal epithelial cell-specific<br><i>TGFBR2</i> deletion during<br>embryogenesis                                                                                                                                            | CRC               | LoxP sites flanking <i>TGFBR2</i> exon<br>2, <i>Fabp1</i> -Cre drives intestine-<br>specific deletion during<br>embryogenesis                                                                                                                    | Mice have increased susceptibility<br>to chemically induced colon<br>cancer.                                                           | 55, 62, 63    |
|                     | <i>TGF-β1IR(fl/fl)</i> / <i>Mx-Cre</i> <sup>+</sup><br>Inducible <i>TGFBR2</i> knockout<br>(129/Sv x C57BL/6J)                                                                                                                                                                                                  | Liver fibrosis    | LoxP sites flanking <i>TGFBR2</i> exon<br>2, with <i>Mx</i> -Cre driving deletion<br>induced by polyinosinic-<br>polycytidic acid injection                                                                                                      | Mice have decreased<br>susceptibility to chemically<br>induced liver fibrosis.                                                         | 55, 64, 65    |
|                     | <i>Pten</i> <sup>LKO</sup> <i>Tgfr2</i> <sup>LKO</sup><br>Liver-specific deletion of <i>PTEN</i><br>and <i>TGFBR2</i> knockout<br>(C57BL6 × 129)                                                                                                                                                                | Liver cancer      | LoxP sites flanking <i>TGFBR2</i> exon<br>2 and <i>PTEN</i> exon 5, with Alb-<br>Cre driving liver-specific<br>deletion                                                                                                                          | By 14 mo, ~86% of mice<br>spontaneously develop liver<br>tumors.                                                                       | 66, 67        |

Supplementary Table 1. Continued

| Gene (and function)                                                                                                                  | Mice model                                                                                                                                                                                                                    | Disease relevance              | Model design                                                                                                                                                           | Model phenotype                                                                                                                | Reference no. |
|--------------------------------------------------------------------------------------------------------------------------------------|-------------------------------------------------------------------------------------------------------------------------------------------------------------------------------------------------------------------------------|--------------------------------|------------------------------------------------------------------------------------------------------------------------------------------------------------------------|--------------------------------------------------------------------------------------------------------------------------------|---------------|
|                                                                                                                                      | <i>Ptf1a</i> <sup>cre/+</sup> / <i>LSL-Kras</i> <sup>G12D/</sup><br>+ <i>Tgfr2</i> <sup>flox/flox</sup><br>Pancreatic epithelial cell-specific<br><i>TGFBR2</i> knockout with KRAS<br>activation<br>(C57BL/6×DBA/2×129/SvJae) | Pancreatic cancer              | LoxP sites flanking <i>TGFBR2</i> exon<br>2, with Ptf1a-Cre driving<br>pancreatic epithelial cell-<br>specific deletion and<br>expression of activating KRAS<br>mutant | By 2 mo, mice die of PDAC.                                                                                                     | 122, 68       |
| <i>BMP8B</i> (ligand)                                                                                                                | <i>BMP8B</i> -KO<br><i>BMP8B</i> knockout (C57Bl6/J)                                                                                                                                                                          | Hepatitis, NASH                | Disruption of <i>BMP8B</i> exon 4 with<br>MCneo cassette                                                                                                               | Mice exhibit decreased<br>susceptibility to chemically<br>induced liver injury and diet-<br>induced NASH.                      | 69, 70        |
| <i>BMPR1</i> (type 1 receptor<br>subunit for BMP2,<br>BMP4, BMP5, BMP6,<br>BMP7, BMP8, GDF5,<br>GDF6, GDF7, AMH)                     | <i>Villin-Cre;Bmpr1a</i> <sup>flox/flox</sup><br>Intestinal epithelial cell-specific<br><i>BMPR1A</i> knockout (C57BL/6)                                                                                                      | IBD                            | LoxP sites flanking <i>BMPR1A</i> exon<br>2, with Villin-Cre driving<br>intestinal epithelial cell-<br>specific deletion                                               | Mice exhibit increased<br>susceptibility to chemically<br>induced colon injury and<br>inflammation.                            | 71, 72        |
|                                                                                                                                      | <i>Bmpr1a</i> <sup>ΔMES</sup><br>Stomach and intestinal<br>mesenchymal cell-specific<br><i>BMPR1A</i> knockout<br>(C57BL/6J)                                                                                                  | CRC                            | LoxP sites flanking <i>BMPR1A</i> exon<br>2, with Fox1-Cre driving<br>myofibroblast-specific<br>deletion in mesenchymal cells<br>of the stomach and intestine          | By 12 mo, mice spontaneously<br>develop polyps in the colon<br>with increased numbers of<br>fibroblasts and<br>myofibroblasts. | 72, 73        |
|                                                                                                                                      | <i>Bmpr1a/Mx1-Cre</i><br>Inducible <i>BMPR1A</i> knockout<br>(C57BL/6)                                                                                                                                                        | Juvenile polyposis<br>syndrome | LoxP sites flanking <i>BMPR1A</i> exon<br>2, Mx1-Cre driving deletion<br>induced by polyinosinic-<br>polycytidic acid injection.                                       | Mice spontaneously develop<br>intestinal polyposis.                                                                            | 74, 75        |
|                                                                                                                                      | <i>Lgr5-Cre;Bmpr1a</i> <sup>flox/flox</sup><br>Stem cell (LGR5 <sup>+</sup> )-specific<br><i>BMPR1A</i> knockout<br>(C57BL/6)                                                                                                 | Gastric inflammation           | LoxP sites flanking <i>BMPR1A</i> exon<br>2, Lgr5-Cre driving stem cell-<br>specific deletion                                                                          | Mice exhibit increased<br>susceptibility to infection-<br>induced gastric inflammation<br>and development of dysplasia.        | 72, 75        |
| <i>SMAD2</i> (R-SMAD<br>activated by TGF-β1,<br>TGF-β2, TGF-β3,<br>Activin A, Activin B,<br>Nodal, GDF1, GDF2,<br>GDF8, GDF9, GDF11) | <i>S2HeKO, S3KO</i><br>Liver-specific <i>SMAD2</i> knockout<br>with global <i>SMAD3</i> knockout<br>(C57BL/6)                                                                                                                 | Hepatitis                      | LoxP sites flanking <i>SMAD2</i> exon<br>2, with Alb-Cre driving liver-<br>specific deletion and with<br>disruption of <i>SMAD3</i> exon 8                             | Mice exhibit increased<br>susceptibility to chemically<br>induced liver injury.                                                | 76, 77        |
|                                                                                                                                      | <i>Apc</i> <sup>580D</sup> / <i>Smad2</i><br>Heterozygous loss of function of<br>both <i>SMAD2</i> and <i>APC</i> in cis<br>(C57BL6/J)                                                                                        | CRC                            | Disruption of <i>SMAD2</i> exons 3 and<br>4 by PGK-neo cassette; LoxP<br>sites flanking <i>APC</i> exon 14,<br>with Cre driving deletion                               | By 30 wk, mice spontaneously<br>develop intestinal polyps and<br>tumors with rapid progression<br>to malignancy.               | 78, 79        |

Supplementary Table 1. Continued

| Gene (and function)                                                                                                                           | Mice model                                                                                                                                                    | Disease relevance | Model design                                                                                                                                                       | Model phenotype                                                                                                                                                                                                                      | Reference no. |
|-----------------------------------------------------------------------------------------------------------------------------------------------|---------------------------------------------------------------------------------------------------------------------------------------------------------------|-------------------|--------------------------------------------------------------------------------------------------------------------------------------------------------------------|--------------------------------------------------------------------------------------------------------------------------------------------------------------------------------------------------------------------------------------|---------------|
| <i>SMAD3</i> (R-SMAD activated by TGF- $\beta$ 1, TGF- $\beta$ 2, TGF- $\beta$ 3, Activin A, Activin B, Nodal, GDF1, GDF2, GDF8, GDF9, GDF11) | <i>Smad3</i> <sup>-/-</sup> <i>SMAD3</i> knockout (C57BL/6 $\times$ 129/S)                                                                                    | GC, CRC           | Disruption of <i>SMAD3</i> exon 2 with IRES-LacZ and neomycin cassette                                                                                             | By 10 mo, mice spontaneously develop invasive GC arising in the forestomach–stomach junction. By 4–6 mo, mice (30%) spontaneously develop large polyps and aggressive, metastatic colon cancer that depends on <i>Helicobacter</i> . | 60, 80        |
|                                                                                                                                               | <i>Smad3</i> <sup>ex8/ex8</sup> <i>SMAD3</i> knockout (C57BL/6 $\times$ Black Swiss)                                                                          | IBD               | Targeted deletion of <i>Smad3</i> exon 8 by homologous recombination, resulting in disruption of the interaction between <i>SMAD3</i> and the <i>TGFB</i> receptor | More than 6 mo, nearly 77% of the mice spontaneously developed chronic inflammation in the intestines.                                                                                                                               | 31            |
|                                                                                                                                               | <i>Smad3</i> <sup>-/-</sup> + <i>Helicobacter SMAD3</i> knockout infected with <i>Helicobacter</i> (129/J)                                                    | CRC               | Disruption of <i>SMAD3</i> exon 2 with IRES-LacZ and neomycin cassette                                                                                             | Mice exhibit increased susceptibility to infection-induced colon cancer.                                                                                                                                                             | 60, 61        |
|                                                                                                                                               | <i>Smad3</i> <sup>-/-</sup> <i>SMAD3</i> knockout (Black Swiss $\times$ 129SVJ)                                                                               | Liver fibrosis    | Disruption of <i>SMAD3</i> exon 8 with neomycin cassette                                                                                                           | Mice are less susceptible to chemically induced liver fibrosis.                                                                                                                                                                      | 81            |
|                                                                                                                                               | <i>Apc</i> <sup>Min/+</sup> <i>Smad3</i> <sup>-/-</sup> <i>SMAD3</i> knockout with heterozygous <i>APC</i> mutation (129/Sv)                                  | CRC               | Disruption of <i>SMAD3</i> exon 2 with neomycin cassette and mutation of <i>APC</i>                                                                                | By 2 mo, mice spontaneously develop tumors in the distal colon, resembling human familial adenomatous polyposis.                                                                                                                     | 70, 82, 83    |
| <i>SMAD5</i> (R-SMAD for BMP2, BMP4, BMP5, BMP6, BMP7, BMP8, BMP9, BMP10, BMP15, GDF5, GDF6, GDF7, AMH)                                       | <i>Smad5</i> <sup>ΔIEC</sup><br>Intestinal epithelial cell-specific <i>SMAD5</i> knockout (C57BL/6)                                                           | IBD               | LoxP sites flanking <i>SMAD5</i> exon 2, with Villin-Cre drives intestinal epithelial cell-specific deletion                                                       | Mice exhibit increased susceptibility to chemically induced colitis.                                                                                                                                                                 | 84, 85        |
| <i>SMAD4</i> (c-SMAD)                                                                                                                         | <i>Smad4</i> <sup>Co/Co</sup> ; <i>PTEN</i> <sup>Co/Co</sup> ; <i>K5-Cre</i><br>Keratinocyte-specific knockout of both <i>SMAD4</i> and <i>PTEN</i> (C57BL/6) | Esophageal and GC | LoxP sites flanking <i>SMAD4</i> exons 8 and 9 and <i>PTEN</i> exon 5 with keratin 5-Cre driving keratinocyte-specific deletion                                    | By 2 mo, mice spontaneously develop invasive squamous cell carcinoma in the forestomach and stomach.                                                                                                                                 | 86–88         |
|                                                                                                                                               | <i>Smad4</i> <sup>β+/-</sup><br><i>SMAD4</i> heterozygosity (129 $\times$ Black Swiss or 129 $\times$ C57B6)                                                  | GC                | Disruption of <i>SMAD4</i> exon 8 with neomycin cassette                                                                                                           | By 6–12 mo, mice spontaneously develop polyposis in the stomach that progresses to invasive cancer.                                                                                                                                  | 89–91         |

Supplementary Table 1. Continued

| Gene (and function) | Mice model                                                                                                                                                                                       | Disease relevance                     | Model design                                                                                                                                                        | Model phenotype                                                                                                                                                                                                                                                             | Reference no. |
|---------------------|--------------------------------------------------------------------------------------------------------------------------------------------------------------------------------------------------|---------------------------------------|---------------------------------------------------------------------------------------------------------------------------------------------------------------------|-----------------------------------------------------------------------------------------------------------------------------------------------------------------------------------------------------------------------------------------------------------------------------|---------------|
|                     | <i>Smad4</i> <sup>co/co</sup> ; <i>Lck-cre</i><br><i>Smad4</i> <sup>co/co</sup> ; <i>CD4-cre</i><br>T cell-specific <i>SMAD4</i> knockout<br>(C57BL/6 × SvEv129 × FVB)                           | Gastrointestinal<br>epithelial cancer | LoxP sites flanking <i>SMAD4</i> exon<br>8, with Lck-Cre or CD4-Cre<br>driving T cell-specific deletion                                                             | Mice spontaneously develop<br>inflammation and epithelial<br>cancers throughout the GI<br>tract.                                                                                                                                                                            | 65            |
|                     | <i>Smad4</i> <sup>+/<i>E6sad</i></sup><br><i>SMAD4</i> heterozygosity<br>(129Ola × C57BL/6Jlco)                                                                                                  | Intestinal cancer                     | Single nucleotide deletion of<br><i>SMAD4</i> exon 6                                                                                                                | By 9–18 mo, mice spontaneously<br>develop adenomas and mixed<br>polyposis of the upper GI tract.                                                                                                                                                                            | 69, 92        |
|                     | <i>Apc</i> <sup>+/<i>1638N</i></sup> / <i>Smad4</i> <sup>+/<i>E6sad</i></sup><br>Heterozygous loss of function of<br>both <i>SMAD4</i> and <i>APC</i> in cis or<br>trans (129Ola × C57BL/6Jlco)  | CRC                                   | Single nucleotide deletion of<br><i>SMAD4</i> exon 6, and disruption<br>of <i>APC</i> exon 15                                                                       | Both trans and cis mice<br>spontaneously develop<br>tumors of the GI tract,<br>desmoids, and epidermal<br>tumors.<br>Trans mice spontaneously<br>develop high numbers of<br>tumors.<br>Cis mice spontaneously develop<br>rapidly progressing disease,<br>dying within 6 wk. | 69, 93        |
|                     | <i>cis-Apc</i> <sup>+/<i>Δ716</i></sup> <i>Smad4</i> <sup>+/<i>-</i></sup><br>Heterozygous loss of function of<br>both <i>SMAD4</i> and <i>APC</i> in cis<br>(129/Sv × C57BL/6)                  | CRC                                   | Disruption of <i>SMAD4</i> exon 1 and<br><i>APC</i> exon 15 with neomycin<br>cassette                                                                               | Mice spontaneously develop<br>polyps in large and small<br>intestine that progress to<br>invasive cancer.                                                                                                                                                                   | 58, 94, 95    |
|                     | <i>Smad4</i> <sup>Co/Co</sup> <i>Pten</i> <sup>Co/Co</sup> <i>Alb-Cre</i><br>Liver-specific <i>SMAD4</i> and <i>PTEN</i><br>(C57BL/6)                                                            | Cholangiocellular<br>carcinoma        | LoxP sites flanking <i>SMAD4</i> exon<br>8 and <i>PTEN</i> exon 5, with Alb-<br>Cre driving liver-specific<br>deletion                                              | By 4–7 mo, mice spontaneously<br>develop cholangiocarcinoma.                                                                                                                                                                                                                | 87, 96        |
|                     | <i>Pdx1Cre</i> ; <i>Kras</i> <sup>G12D/+</sup> ; <i>Smad4</i> <sup>lox/lox</sup><br>Pancreatic epithelial cell-specific<br><i>SMAD4</i> knockout with KRAS<br>activation<br>(C57BL/6 × 129SvJae) | Pancreatic cancer                     | LoxP sites flanking <i>SMAD4</i> exon<br>8, with Pdx-Cre driving<br>pancreatic epithelial cell-<br>specific deletion and<br>expression of activating KRAS<br>mutant | Mice spontaneously develop<br>pre-malignant PanIN that<br>progresses to early-stage<br>PDAC.                                                                                                                                                                                | 87, 97, 98    |
|                     | <i>Smad4</i> <sup>Co/Co</sup> ; <i>Pten</i> <sup>Co/Co</sup> ; <i>Pdx-Cre</i><br>Pancreatic epithelial cell-specific<br><i>SMAD4</i> and <i>PTEN</i> knockout<br>(129 × FVB × Black Swiss)       | Pancreatic cancer                     | LoxP sites flanking <i>SMAD4</i> exon<br>8 and <i>PTEN</i> exon 5, with<br>Pdx1-Cre driving pancreatic<br>epithelial cell-specific deletion                         | By 0.5–4 mo, mice spontaneously<br>develop ductal tumors that<br>progress to PDAC with a<br>subset developing metastatic<br>disease.                                                                                                                                        | 87, 99        |

Supplementary Table 1. Continued

| Gene (and function)                                                                                | Mice model                                                                                                                                     | Disease relevance                       | Model design                                                                               | Model phenotype                                                                                                                       | Reference no.  |
|----------------------------------------------------------------------------------------------------|------------------------------------------------------------------------------------------------------------------------------------------------|-----------------------------------------|--------------------------------------------------------------------------------------------|---------------------------------------------------------------------------------------------------------------------------------------|----------------|
| <i>SMAD7</i> (I-SMAD for SMAD2 and SMAD3)                                                          | <i>Smad7<sup>liver-KO</sup></i><br>Liver-specific <i>SMAD7</i> knockout (C57BL/6)                                                              | Hepatitis; alcohol-induced liver injury | LoxP sites flanking <i>SMAD7</i> exon 4, with Alb-Cre driving liver-specific deletion      | Mice (30%) spontaneously develop liver damage and all exhibit increased susceptibility to alcohol-induced liver injury and steatosis. | 100            |
|                                                                                                    | <i>Smad7Tg</i><br>T cell-specific expression of <i>SMAD7</i> (C57BL/6)                                                                         | IBD                                     | <i>SMAD7</i> with CD2 promoter/enhancer driving T cell-specific expression                 | Mice exhibit more susceptibility to chemically induced colitis but fewer colitis-induced tumors.                                      | 101, 102       |
|                                                                                                    | <i>S7tg</i><br>Hepatocyte-specific expression of <i>SMAD7</i> (C57BL/6)                                                                        | Liver fibrosis                          | Flag-tagged <i>SMAD7</i> with CRP promoter driving hepatocyte-specific expression          | Mice exhibit decreased susceptibility to chemically induced liver damage and fibrosis.                                                | 108            |
|                                                                                                    | <i>Smad7 KO</i><br><i>SMAD7</i> knockout (C57BL/6)                                                                                             | Liver cancer                            | Disruption of <i>SMAD7</i> exon 1 with PGKneobpA cassette                                  | Mice exhibit increased susceptibility to chemically induced HCC.                                                                      | 110, 103       |
|                                                                                                    | TTR-Cre- <i>SMAD7</i> KO,<br>Hepatocyte-specific <i>SMAD7</i> knockout (C57BL/6)                                                               | Liver cancer                            | LoxP sites flanking <i>SMAD7</i> exon 1 with TTR-Cre driving hepatocyte-specific deletion  | Mice exhibit increased susceptibility to chemically induced HCC.                                                                      | 109, 104       |
|                                                                                                    | <i>SMAD7Tg</i><br>Pancreas-specific expression of <i>SMAD7</i> (DBA2)                                                                          | Pancreatic cancer                       | Myc-tagged <i>SMAD7</i> with elastase I promoter driving pancreas-specific expression      | By 6 mo, mice develop PanIN.                                                                                                          | 128            |
| <i>SPTBN1</i> (adaptor for activated SMAD2 and SMAD3)                                              | <i>Smad4<sup>+/-</sup>Sptbn1<sup>+/-</sup></i> Heterozygous loss of function of both <i>SMAD4</i> and <i>SPTBN1</i> (129SvEv $\times$ C57BL/6) | GC, liver cancer                        | Disruption of <i>SPTBN1</i> exon 25 and <i>SMAD4</i> exon 8 with neomycin cassette         | All mice spontaneously develop gastric polyps with a subset progressing to cancer; a subset of mice develop colon cancer.             | 62, 64, 89–e91 |
|                                                                                                    | <i>Sptbn1<sup>+/-</sup>SPTBN1</i> heterozygosity (129SvEv/Black Swiss)                                                                         | Liver steatosis, fibrosis, liver cancer | Disruption of <i>SPTBN1</i> exon 25 with neomycin cassette                                 | By 15 mo, 40% of mice spontaneously develop liver diseases and cancer.                                                                | 99, 105        |
|                                                                                                    | <i>Sptbn1<sup>+/-</sup>Itih4<sup>-/-</sup></i><br>Heterozygous loss of <i>SPTBN1</i> and knockout of <i>ITIH4</i>                              | Liver cancer                            | Disruption of <i>SPTBN1</i> exon 25, and <i>ITIH4</i> exons 2 and 3 with neomycin cassette | Mice exhibit increased susceptibility to liver cancer.                                                                                | 100            |
| <i>SMURF1</i> (ubiquitin ligase that targets TGFBR1/TGFBR2 and SMAD2 and SMAD3 to inhibit pathway) | <i>Smurf1<sup>-/-</sup>SMURF1</i> knockout (C57BL/6)                                                                                           | NAFLD, alcohol-induced liver disease    | Disruption of <i>SMURF1</i> exons 6, 7, and 8 with neomycin cassette                       | Mice exhibit increased susceptibility to alcohol-induced steatohepatitis and high-fat diet-induced liver disease.                     | 106            |

Supplementary Table 1. Continued

| Gene (and function)                                       | Mice model                                                                        | Disease relevance  | Model design                                                                | Model phenotype                                                                                                                   | Reference no. |
|-----------------------------------------------------------|-----------------------------------------------------------------------------------|--------------------|-----------------------------------------------------------------------------|-----------------------------------------------------------------------------------------------------------------------------------|---------------|
|                                                           | <i>Smurf1</i> <sup>-/-</sup> <i>SMURF1</i> knockout<br>(Black Swiss × 129/SvEv)   | NASH               | Disruption of <i>SMURF1</i> exons 6, 7,<br>and 8 with neomycin cassette     | Old mice spontaneously develop<br>NASH.                                                                                           | 107           |
| <i>GDF15</i> (ligand)                                     | <i>GDF15-Tg</i><br>Liver-specific <i>GDF15</i> expression<br>(C57BL/6)            | NASH               | Liver-specific expression of<br>human <i>GDF15</i> from the pLiv7<br>vector | Mice exhibit reduced<br>susceptibility to diet-induced<br>NASH.                                                                   | 108           |
|                                                           | <i>Gdf15</i> <sup>-/-</sup><br><i>Gdf15</i> knockout mice<br>(C57BL/6/ × 129/SvJ) | NASH, liver cancer | Disruption of <i>GDF15</i> exon 2 with<br>neomycin cassette                 | Mice exhibit increased<br>susceptibility to diet-induced<br>NASH and increased<br>susceptibility to chemically<br>induced HCC.    | 108–110       |
| <i>STRAP</i> (inhibitor of<br>TGFBR1/TGFBR2<br>signaling) | <i>Strap</i> <sup>+/-</sup><br><i>STRAP</i> heterozygosity (C57BL/6)              | CRC                | Disruption of <i>STRAP</i> exon 3 and 4                                     | Mice exhibit reduced<br>susceptibility to chemically<br>induced colon cancer that is<br>associated with few cancer<br>stem cells. | 111, 112      |

NOTE. References for the original development of the mouse models and references for studies showing the phenotypes are included.  
c-SMAD, common SMAD; I-SMAD, inhibitory SMAD; R-SMAD, receptor-activated SMAD.

**Supplementary Table 2.** Reviews Related to Transforming Growth Factor- $\beta$  Signaling or Diseases and Cancers of the Gastrointestinal System

| Review topic                                    | Reference no.                                  |
|-------------------------------------------------|------------------------------------------------|
| TGF- $\beta$ signaling                          | <a href="#">e113–e120</a>                      |
| BE and esophageal cancer                        | <a href="#">e121–e123</a>                      |
| IBD, hereditary colon cancer syndromes, and CRC | <a href="#">e124–e129</a>                      |
| NAFLD, NASH, and HCC                            | <a href="#">93</a> , <a href="#">e130–e135</a> |
| Pancreatic cancer                               | <a href="#">e136–e138</a>                      |
